# Supplementary material
Source: Elsevier journal article supplement (https://ora.ox.ac.uk/objects/uuid:a352acd6-8f67-49bb-8740-7e2e4b0ca500/files/rft848s91x:mmc1.pdf)
Supplement: mmc1 [file rft848s91x:mmc1.pdf]

**Cell Systems, Volume 15**

## **Supplemental information**

**The master regulator OxyR orchestrates bacterial  
oxidative stress response genes in space and time**

**Divya Choudhary, Kevin R. Foster, and Stephan Uphoff**

## Supplementary Figures

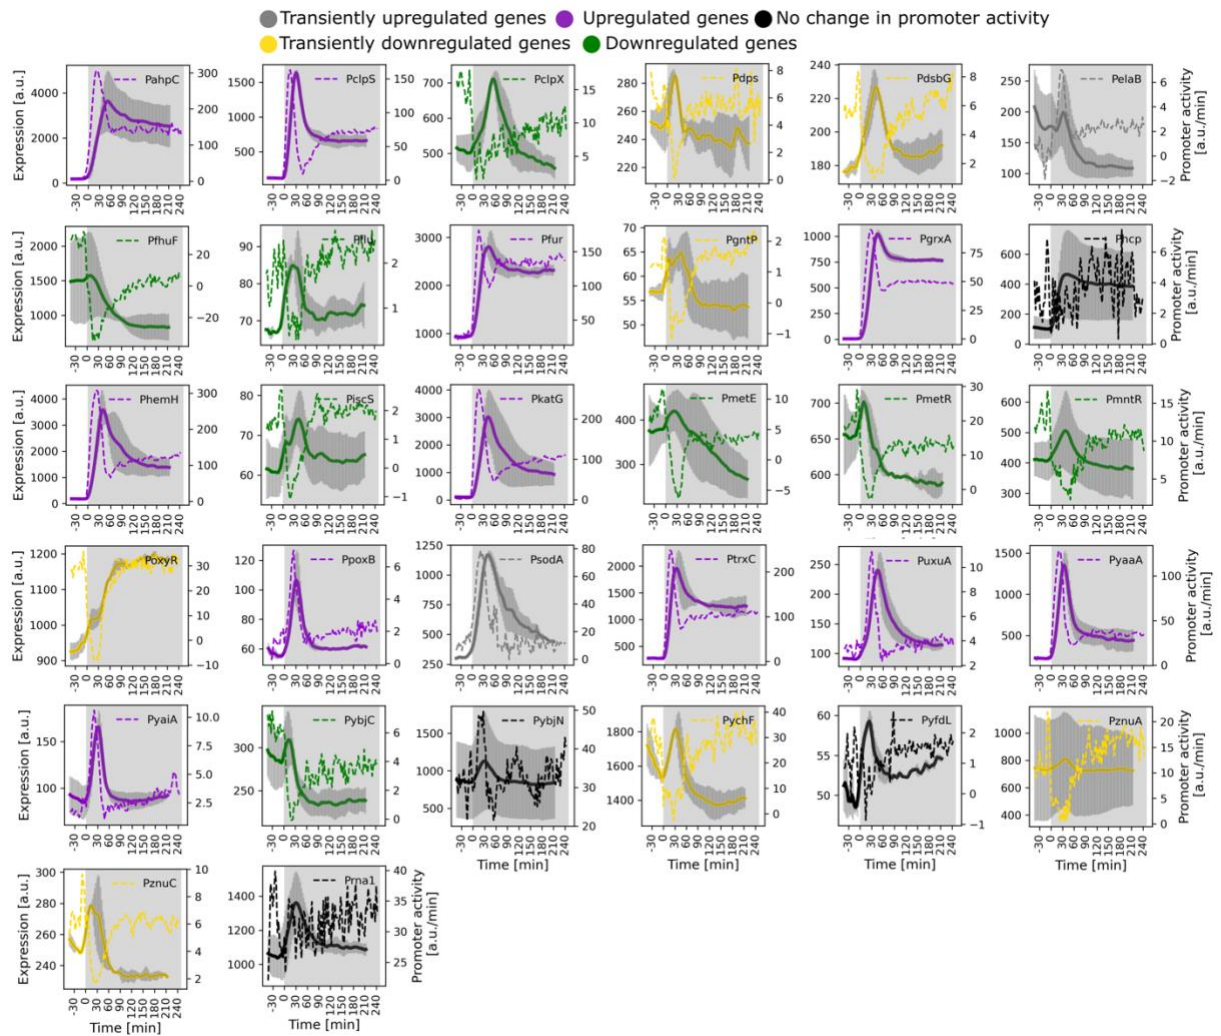

**Figure S1: Gene expression dynamics during constant H<sub>2</sub>O<sub>2</sub> stress**

Mean expression levels (bold) and promoter activity (dash) of frontier cells for 31 transcriptional reporters (ordered alphabetically) and the constitutively expressed promoter *Prna1-mKate2* with constant 100  $\mu$ M H<sub>2</sub>O<sub>2</sub> treatment from t = 0 minutes (shaded region). Line colours correspond to the gene regulation categories (upregulated :purple, down-regulated: green, transiently up- (grey) or down- (yellow) regulated, no change in promoter activity: black). Error bars represent standard deviation (n  $\geq$  1000 cells and  $\geq$  2 repeats per gene).

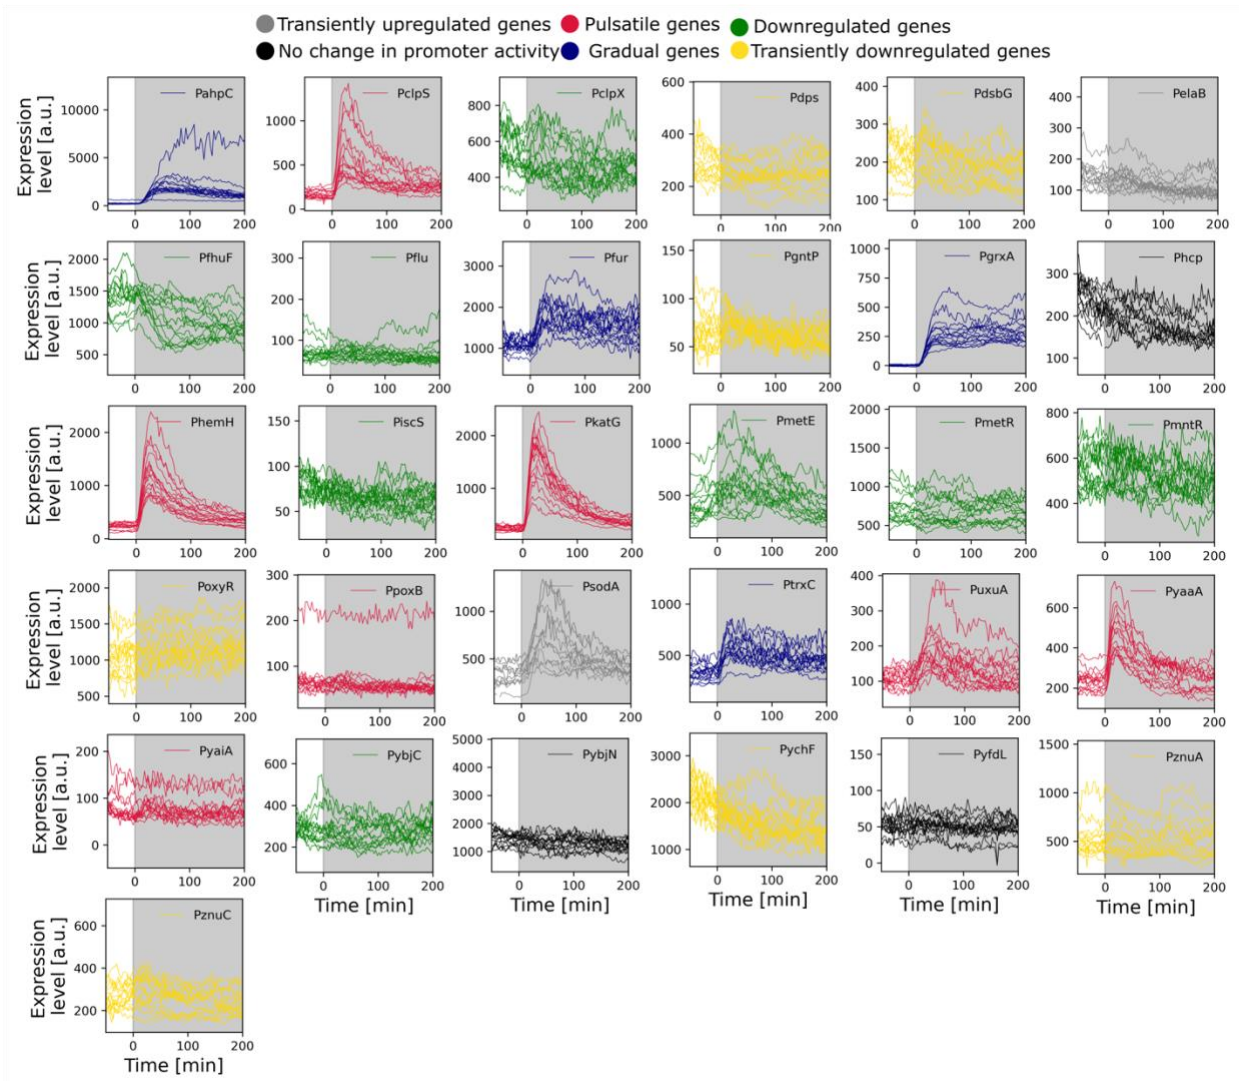

**Figure S2: Single cell expression traces of oxidative stress response genes display the cell-cell variability**

Single cell expression levels of mother cells for 31 transcriptional reporters with constant 100  $\mu\text{M}$   $\text{H}_2\text{O}_2$  treatment from  $t = 0$  minutes (shaded region). Line colours correspond to the gene regulation categories (pulsatile: pink, gradual: blue, down-regulated: green, transiently up- (grey) or down- (yellow) regulated, no change in promoter activity: black).  $n = 15$  representative traces per gene. Note that the magnitude of the oxidative stress response is substantially lower in mother cells compared to frontier cells. Cells protect each other by actively scavenging local  $\text{H}_2\text{O}_2$ , creating steep micro-meter scale gradients of oxidative stress response. Consequently, the mother cells experience lower stress levels than frontier cells. Thus, the reduction in growth rate for mother cells is smaller, making the gene expression pulse in mother cells (Figure S2) less pronounced compared to the frontier cells (Figure S1).

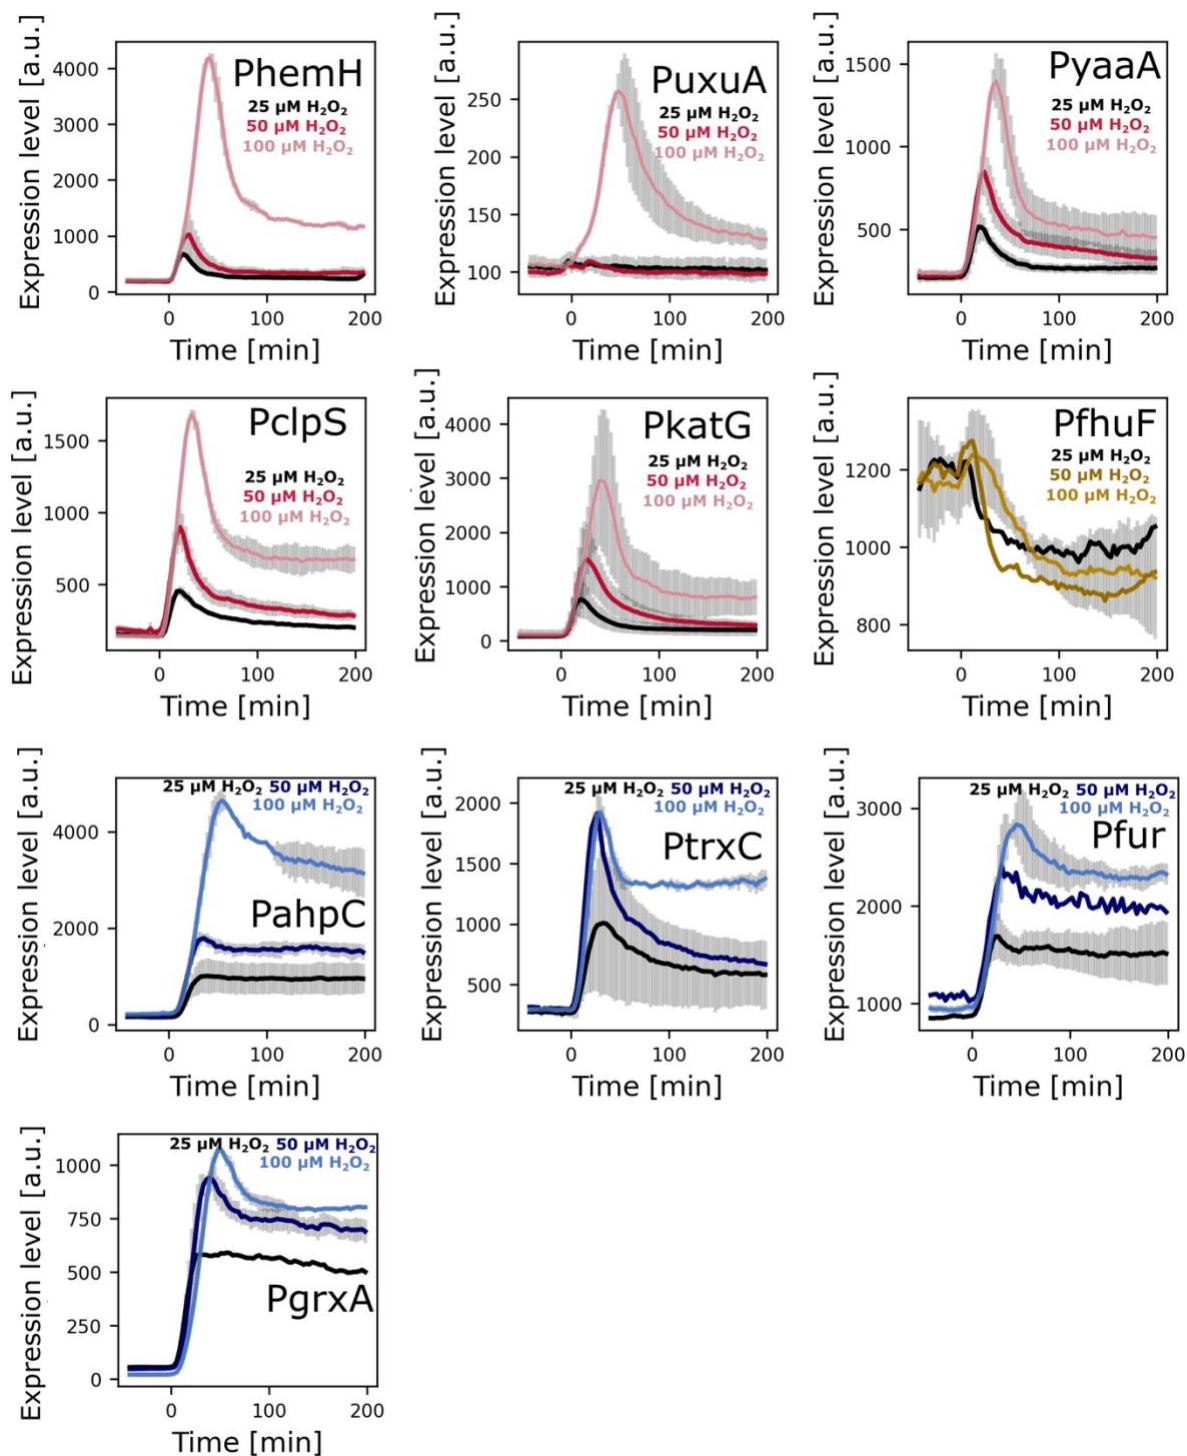

**Figure S3: Pulsatile genes exhibit higher expression sensitivity to  $H_2O_2$  stress intensity**

Mean expression of frontier cells for the indicated transcriptional reporters under 25  $\mu M$ , 50  $\mu M$  and 100  $\mu M$   $H_2O_2$  provided from  $t = 0$  min (red: pulsatile, blue: gradually responding, yellow: downregulated). Error bars: standard deviation ( $n \geq 2$  repeats per gene).

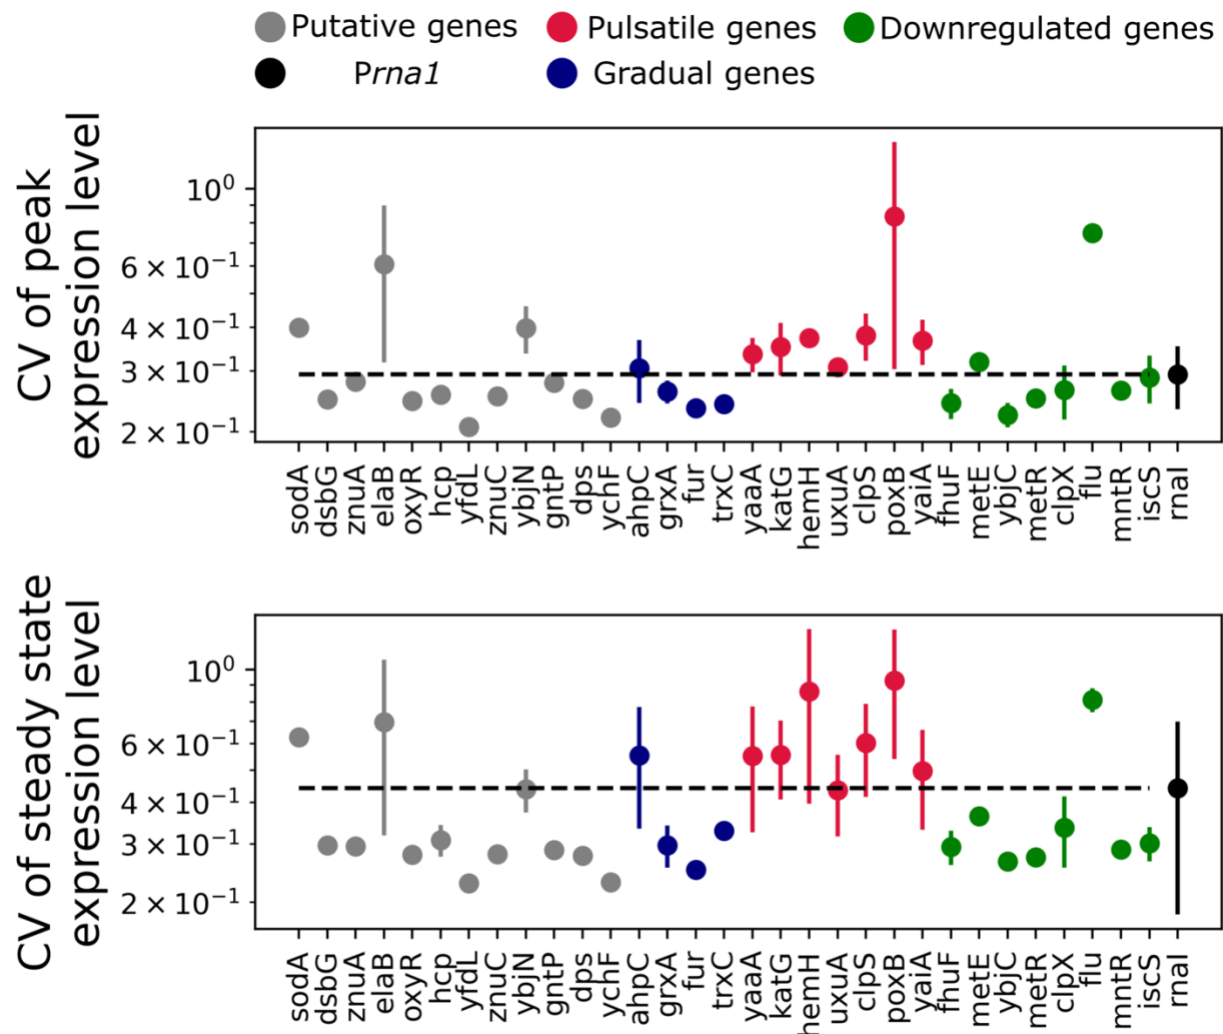

**Figure S4: Cell-cell variability in gene expression magnitude for oxidative stress response genes in different regulation categories**

Mean coefficient of variation for peak (top) and steady state (bottom) gene expression values for frontier cells under 100  $\mu\text{M}$   $\text{H}_2\text{O}_2$  treatment (pulsatile: red, gradual: blue, negative: green, putative: grey, constitutive *Prna1*: black). Error bars represent standard deviation (n  $\geq 3$  repeats per gene)

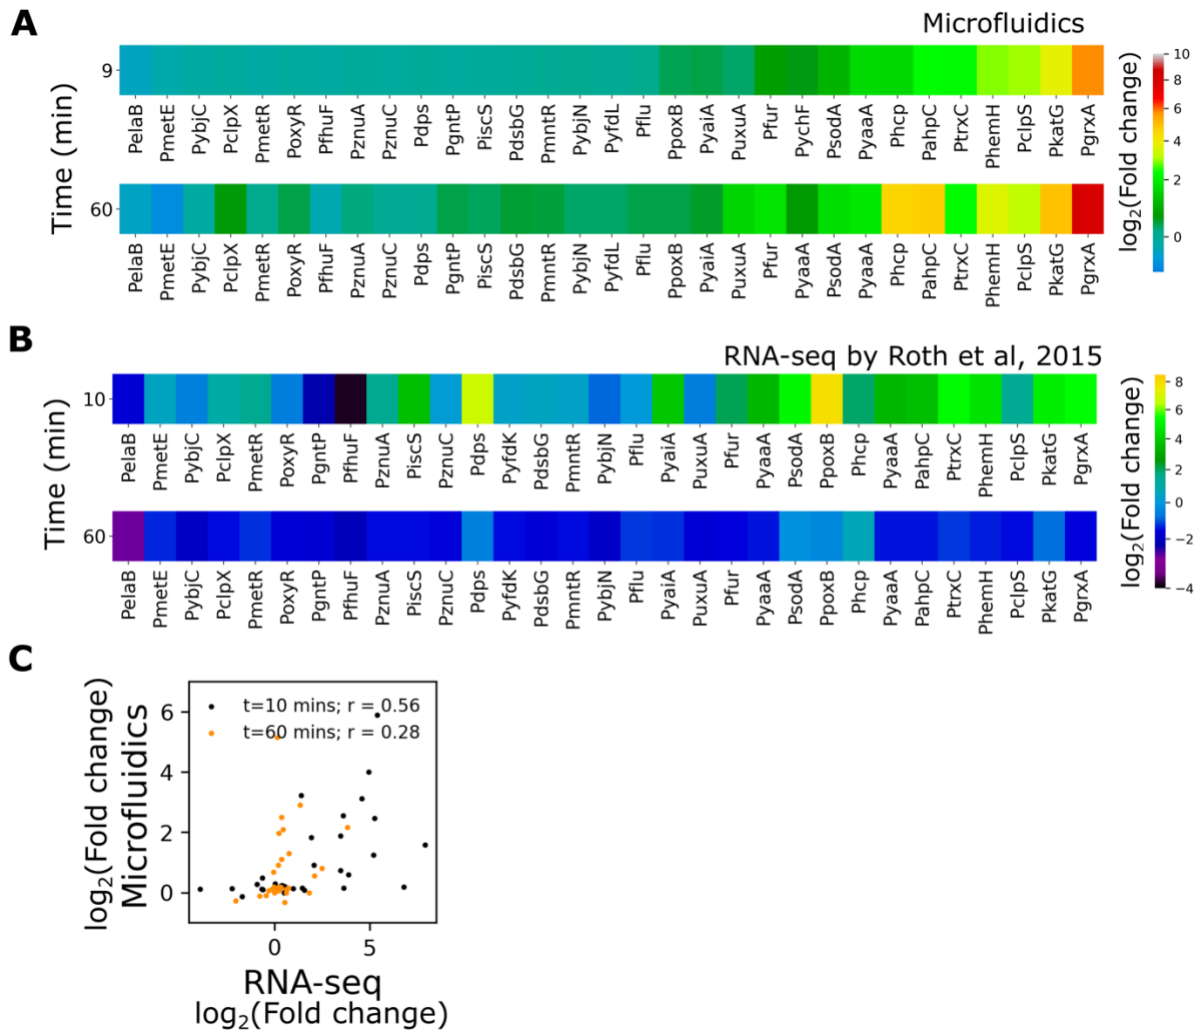

**Figure S5: Gene expression level changes in our study compared to the bulk mRNA level changes, reported by Roth *et al.*, under  $H_2O_2$  stress**

(A) Heatmap represents mean  $\log_2$ -fold change in gene expression relative to basal level of frontier cells for 31 transcriptional reporters at 9 minutes (top) and 60 minutes (bottom) post treatment with 100  $\mu M$   $H_2O_2$  ( $n \geq 1000$  cells and  $\geq 2$  repeats per gene). (B) Heatmap represents data collected by Roth *et al.*<sup>4</sup>, showing mean  $\log_2$ -fold change in mRNA levels of cells for 31 genes at 10 mins (top) and 60 mins (bottom) after treatment with 2.5 mM  $H_2O_2$ . (C) Comparison of  $\log_2$ -fold change in gene expression levels from microfluidic single-cell imaging and mRNA levels in panel A and B at 10 min (black) and 60 minutes (orange) post  $H_2O_2$  treatment. Pearson's coefficient ( $r$ ) for linear fit between the data sets are indicated in the plot.

**Table S1: Genes chosen for this study along with their characteristics.**

| #  | Gene        | Function                                 | Implicated in oxidative stress | Regulation in this study (peak /steady-state) | Promoter activity significance value (peak /steady-state) |
|----|-------------|------------------------------------------|--------------------------------|-----------------------------------------------|-----------------------------------------------------------|
| 1  | <i>sodA</i> | Superoxide dismutase                     | P <sup>47</sup>                | P/-                                           | 1.72e <sup>-06</sup> /n.s.                                |
| 2  | <i>fhuF</i> | Ferric iron reductase                    | N <sup>4,48,49</sup>           | N/N                                           | 2.21e <sup>-18</sup> /2.46e <sup>-10</sup>                |
| 3  | <i>trxC</i> | Thioredoxin 2                            | P <sup>4,36,44-46,48,49</sup>  | P/P                                           | 2.83e <sup>-23</sup> /2.65e <sup>-24</sup>                |
| 4  | <i>yaaA</i> | Suppress intracellular iron levels       | P <sup>4,38,48</sup>           | P/P                                           | 2.23e <sup>-09</sup> /2.0e <sup>-12</sup>                 |
| 5  | <i>dps</i>  | Fe-binding & storage                     | P <sup>4,36,49,51,53</sup>     | N/-                                           | 4.9e <sup>-05</sup> /n.s.                                 |
| 6  | <i>ahpC</i> | Akylhydroperoxidase                      | P <sup>4,36,42,43,48,49</sup>  | P/P                                           | 1.45e <sup>-17</sup> /4.36e <sup>-06</sup>                |
| 7  | <i>katG</i> | Catalase                                 | P <sup>4,30,36,42,48,49</sup>  | P/P                                           | 5.24e <sup>-22</sup> /2.65e <sup>-24</sup>                |
| 8  | <i>grxA</i> | Glutaredoxin-1                           | P <sup>4,36,44,45,49</sup>     | P/P                                           | 7.029e <sup>-18</sup> /1.18e <sup>-18</sup>               |
| 9  | <i>dsbG</i> | Sulfenic acid reductase                  | P <sup>4,49,54,80</sup>        | N/-                                           | 1.912e <sup>-09</sup> /n.s.                               |
| 10 | <i>znuA</i> | Zinc transport                           | P <sup>36</sup>                | N/-                                           | 7.61e <sup>-06</sup> /n.s.                                |
| 11 | <i>metE</i> | methionine synthase                      | P/N <sup>36,55</sup>           | N/N                                           | 3.73e <sup>-09</sup> /2.31e <sup>-06</sup>                |
| 12 | <i>oxyR</i> | OxyR                                     | N <sup>4,32,49</sup>           | N/-                                           | 1.512e <sup>-09</sup> /n.s.                               |
| 13 | <i>hemH</i> | Ferrochelataase                          | P <sup>4,41,48,49</sup>        | P/P                                           | 7.029e <sup>-18</sup> /1.18e <sup>-18</sup>               |
| 14 | <i>mntR</i> | Mn <sup>2+</sup> regulator <sup>56</sup> | N <sup>4,49</sup>              | N/N                                           | 1.359e <sup>-10</sup> /0.015                              |
| 15 | <i>gntP</i> | gluconate permease                       | N <sup>4,48,49</sup>           | N/-                                           | 1.512e <sup>-09</sup> /n.s.                               |
| 16 | <i>uxuA</i> | Mannonate hydrolase                      | N <sup>4,48,49</sup>           | P/P                                           | 3.36e <sup>-05</sup> /0.016                               |
| 17 | <i>iscS</i> | Iron-sulfur cluster assembly             | N <sup>40,48</sup>             | N/-                                           | 1.29e <sup>-09</sup> /n.s.                                |
| 18 | <i>hcp</i>  | Hybrid cluster proteins of Fe/S          | P <sup>4,49,57</sup>           | -/-                                           | n.s./ n.s.                                                |
| 19 | <i>flu</i>  | surface adhesin                          | N/P <sup>4,36,49,58</sup>      | N/N                                           | 0.0076/0.00545                                            |

|    |             |                                              |                         |     |                                              |
|----|-------------|----------------------------------------------|-------------------------|-----|----------------------------------------------|
| 20 | <i>ybjC</i> | Unknown                                      | N <sup>4,36,48,49</sup> | N/N | 1.39e <sup>-09</sup> /0.00036                |
| 21 | <i>ychF</i> | ATPase                                       | N <sup>4,49,59</sup>    | N/- | 2.77e <sup>-06</sup> /n.s.                   |
| 22 | <i>yfdL</i> | Putative ligase                              | - <sup>80</sup>         | -/- | n.s./ n.s.                                   |
| 23 | <i>metR</i> | methionine biosynthesis <sup>81</sup>        | P <sup>4,36</sup>       | N/N | 6.046e <sup>-09</sup> /3.73e <sup>-06</sup>  |
| 24 | <i>znuC</i> | Zinc transport <sup>82</sup>                 | P <sup>4,36</sup>       | N/- | 1.34e <sup>-06</sup> /n.s.                   |
| 25 | <i>ybjN</i> | Unknown                                      | N <sup>4,49</sup>       | -/- | n.s./ n.s.                                   |
| 26 | <i>elaB</i> | Membrane integrity                           | P <sup>4,60</sup>       | P/P | 2.05e <sup>-05</sup> /n.s.                   |
| 27 | <i>fur</i>  | iron-homeostatic control protein             | P <sup>4,39,48,49</sup> | P/P | 2.44e <sup>-12</sup> /5.60e <sup>-13</sup>   |
| 28 | <i>poxB</i> | pyruvate:quinoneoxidoreductase <sup>83</sup> | P <sup>4,48</sup>       | P/P | 8.58e <sup>-07</sup> /6.17e <sup>-05</sup>   |
| 29 | <i>yaiA</i> | Unknown                                      | P <sup>4,48</sup>       | P/P | 0.00015/0.00279                              |
| 30 | <i>clpS</i> | Iron sequestration                           | P <sup>37</sup>         | P/P | 1.3877e <sup>-13</sup> /1.18e <sup>-18</sup> |
| 31 | <i>clpX</i> | Iron sequestration                           | P <sup>37</sup>         | N/N | 1.738e <sup>-05</sup> /3.67e <sup>-06</sup>  |

P: upregulation, N: downregulation; p-values using Mann-Whitney tests where n.s. for p>0.05
